# Supplementary material for: Arbidol inhibits human esophageal squamous cell carcinoma growth in vitro and in vivo through suppressing ataxia telangiectasia and Rad3-related protein kinase
Source: eLife journal article supplement (doi:10.7554/elife.73953), 2022-09-09
Supplement: supp [file elife-73953-supp-v1.zip]

|                      |       |   |   |
|----------------------|-------|---|---|
| KYSE150 cell lysate  | input | + | + |
| Sepharose 4B         | -     | + | - |
| Arbidol Sepharose 4B | -     | - | + |

WB: CDC7

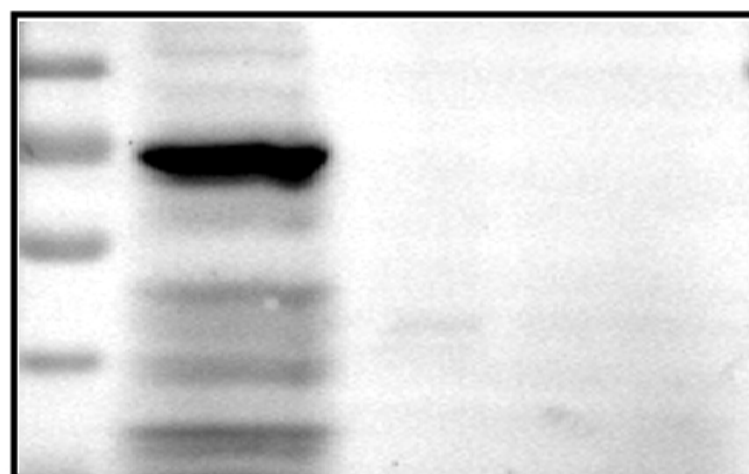

100kDa  
70kDa  
55kDa  
40kDa

Loading control: CDC7

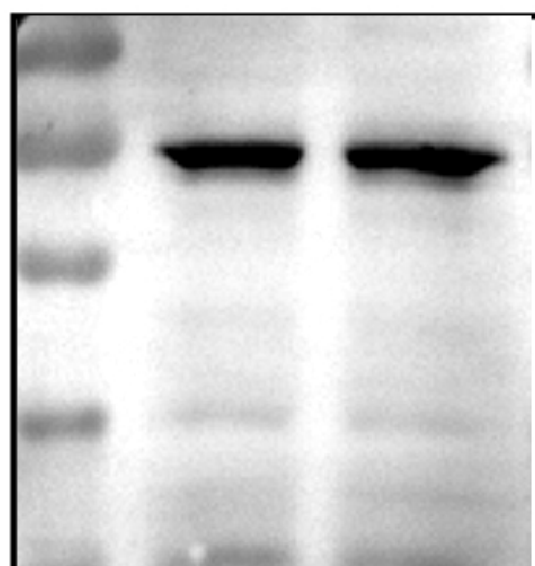

100kDa  
70kDa  
55kDa  
40kDa
