# Supplementary figures and images for: Arbidol inhibits human esophageal squamous cell carcinoma growth in vitro and in vivo through suppressing ataxia telangiectasia and Rad3-related protein kinase
Source: eLife journal article supplement (doi:10.7554/elife.73953), 2022-09-09

Fig. 3

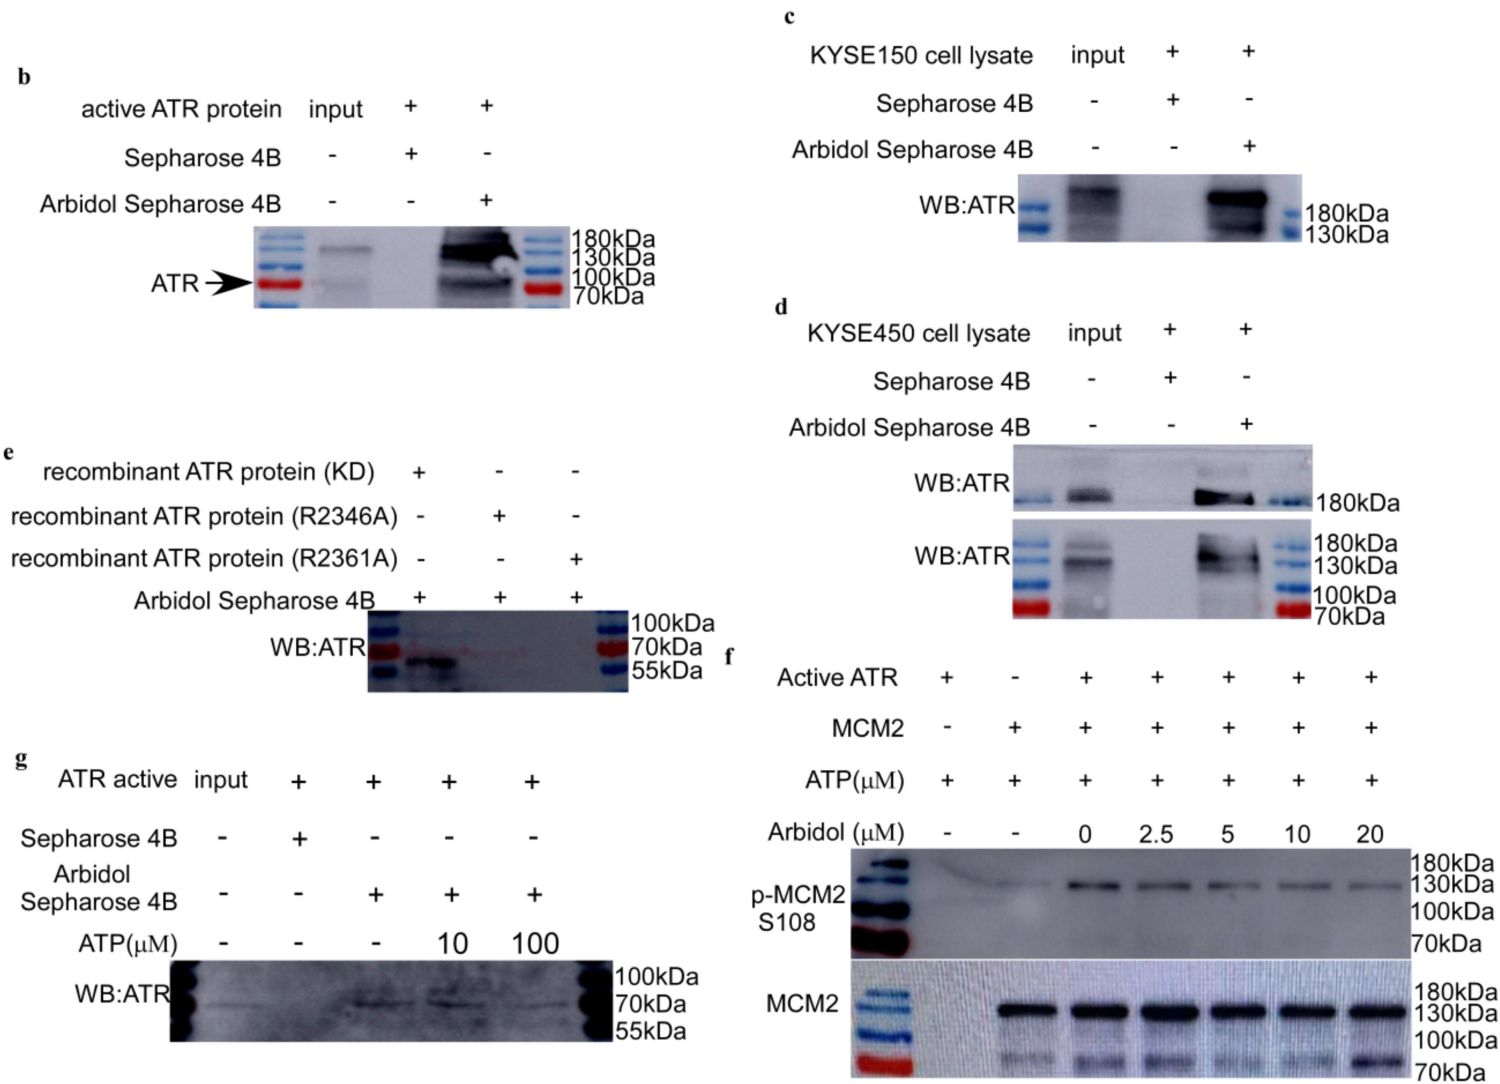

Supplement: supp [file elife-73953-supp-v1.zip]

Fig. 2

g

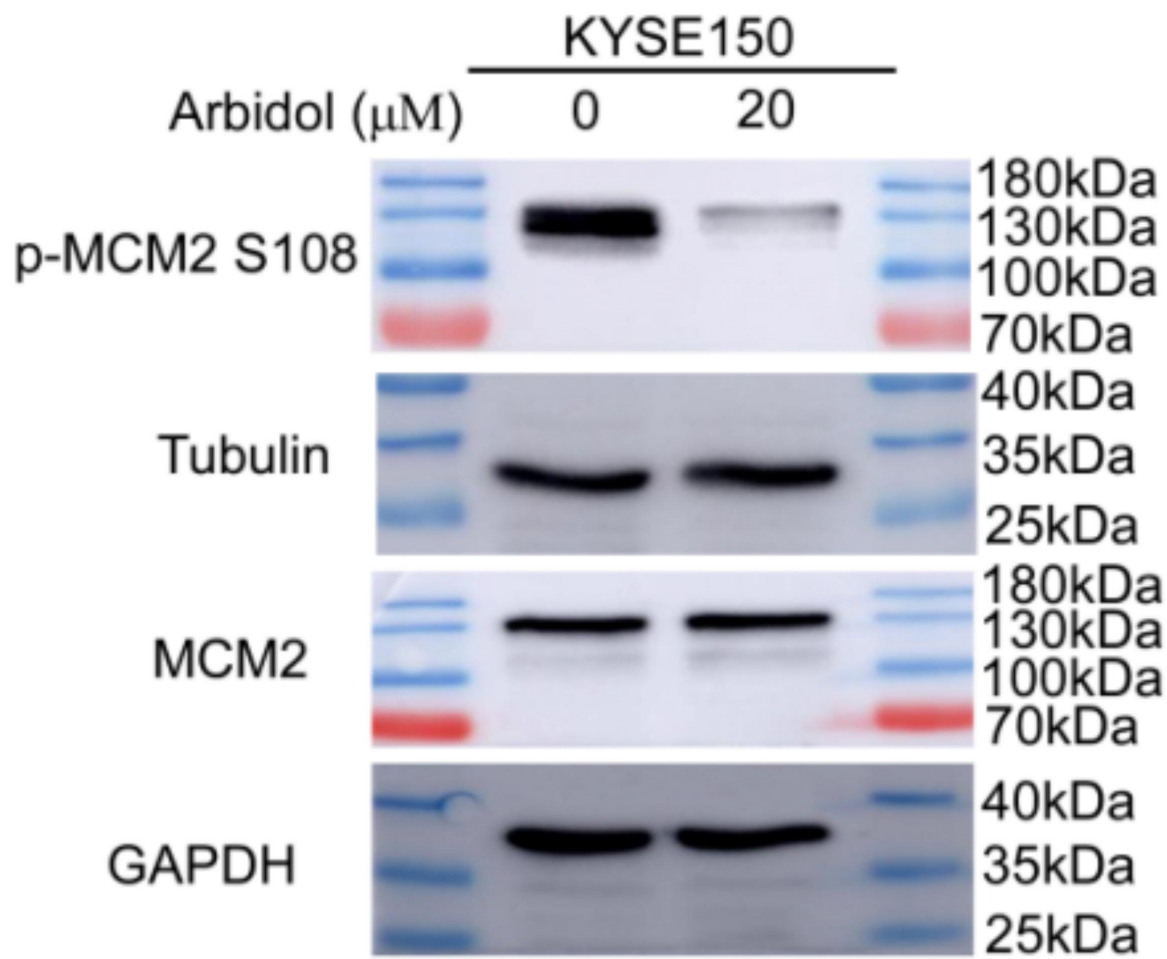

Supplement: supp [file elife-73953-supp-v1.zip]

Fig. 4

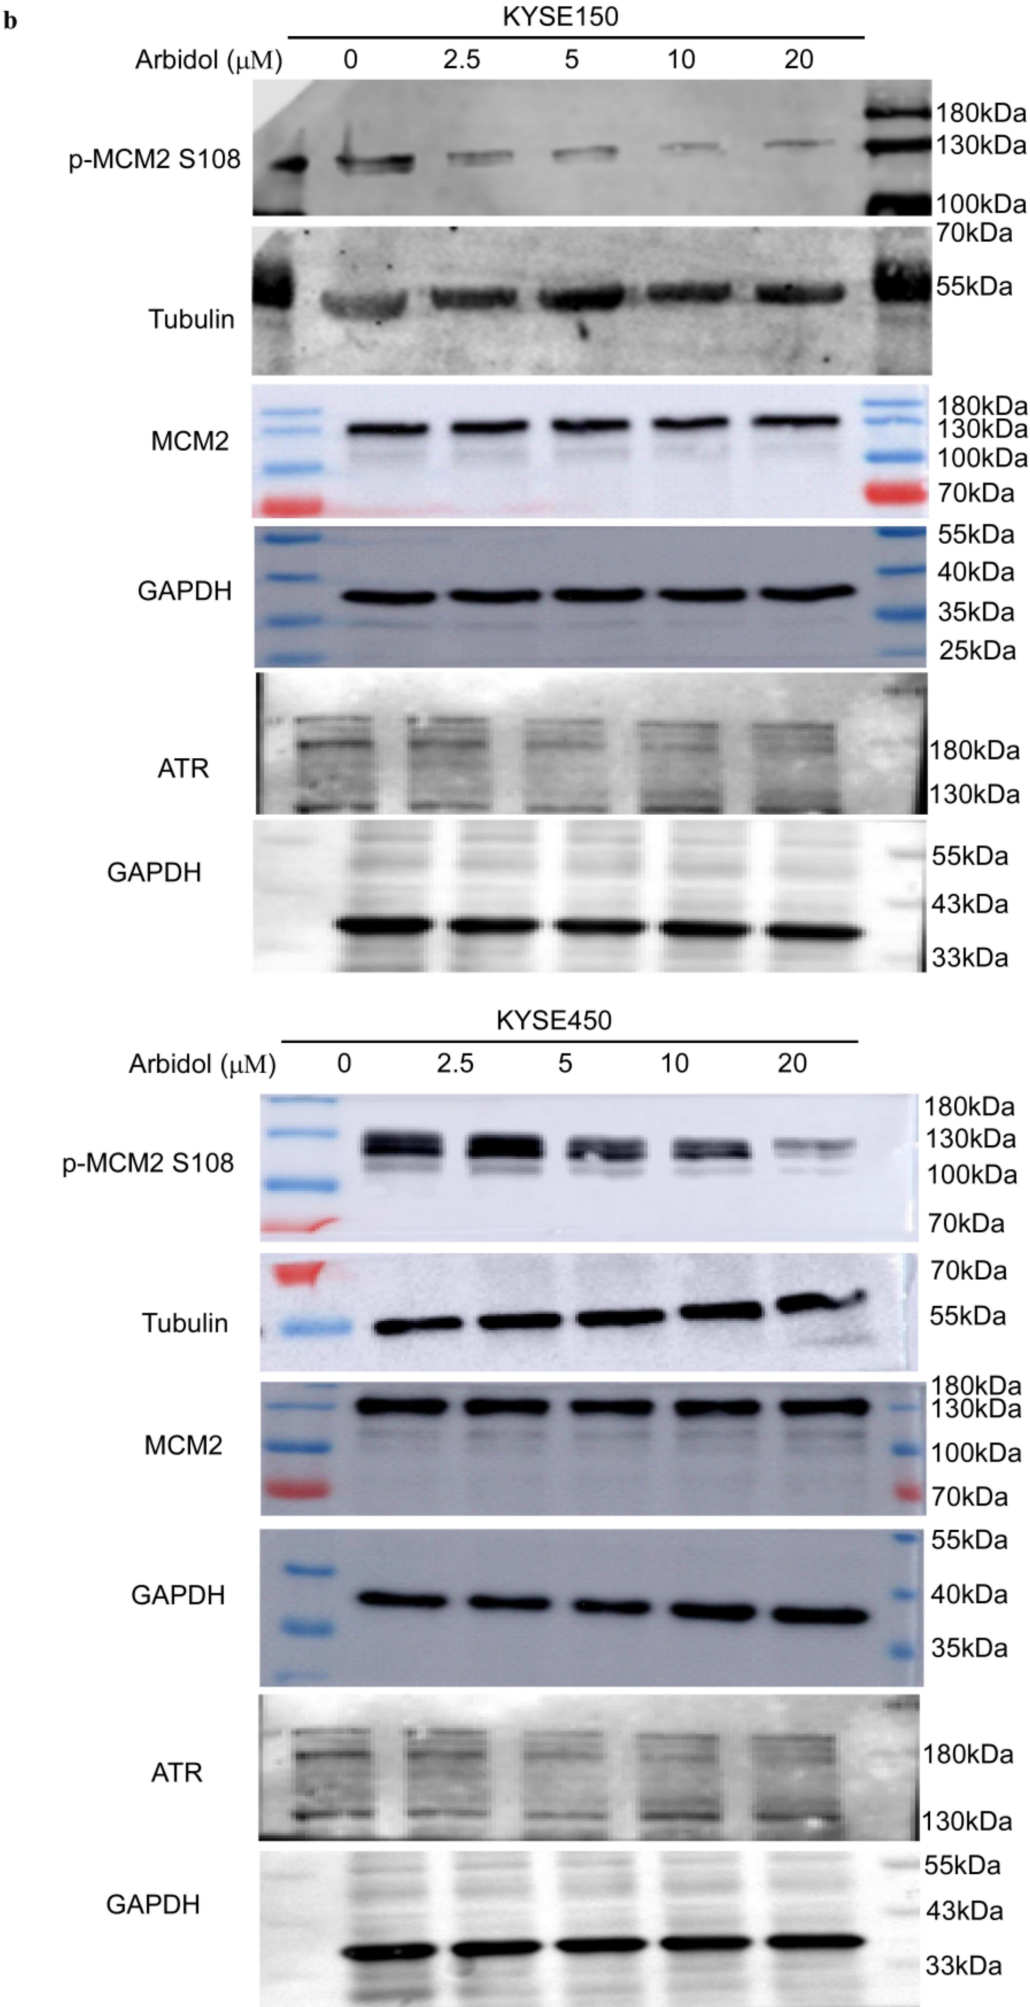

Supplement: supp [file elife-73953-supp-v1.zip]

Fig. 5

d

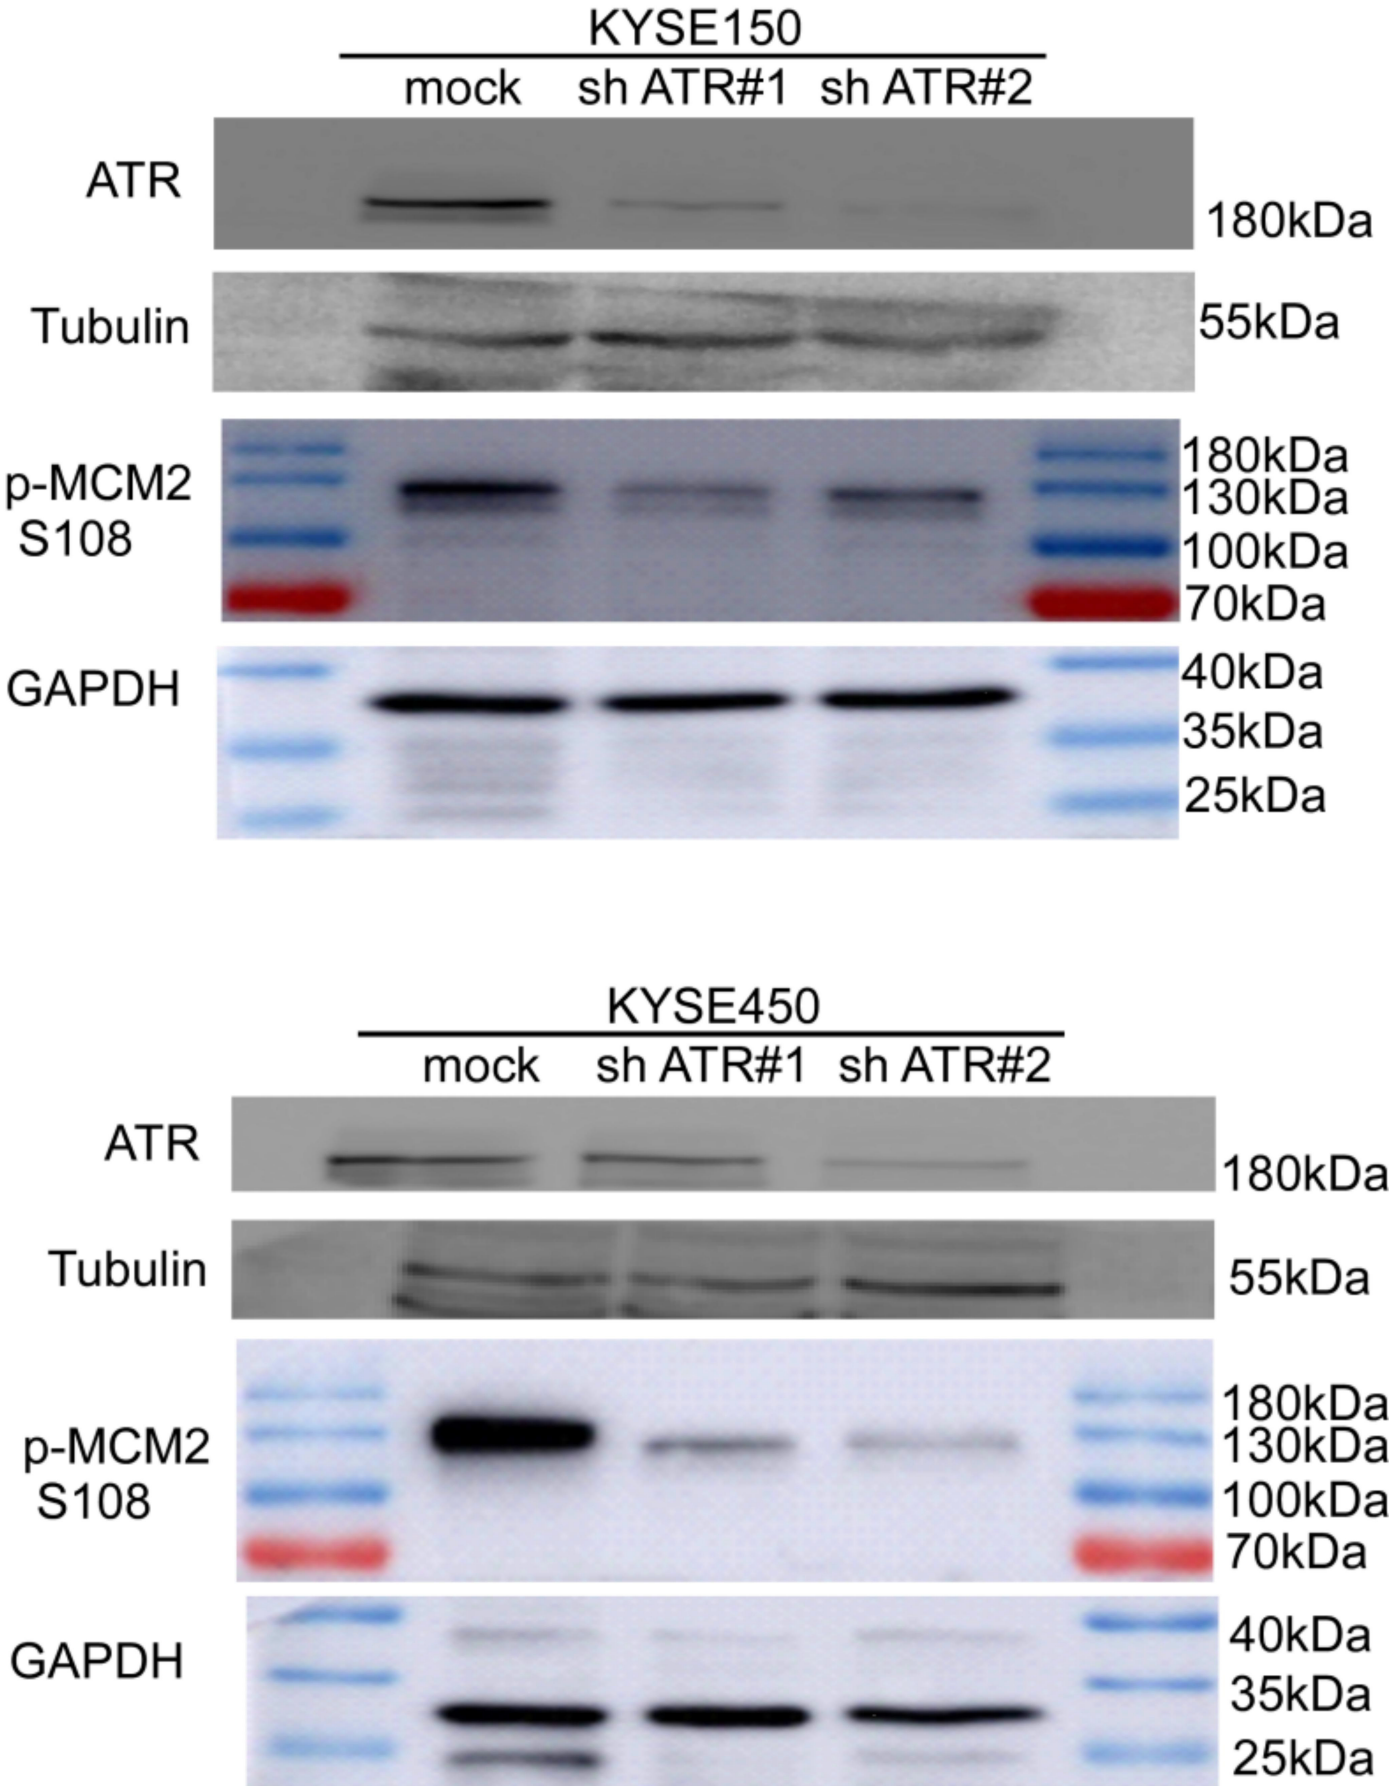

Supplement: supp [file elife-73953-supp-v1.zip]

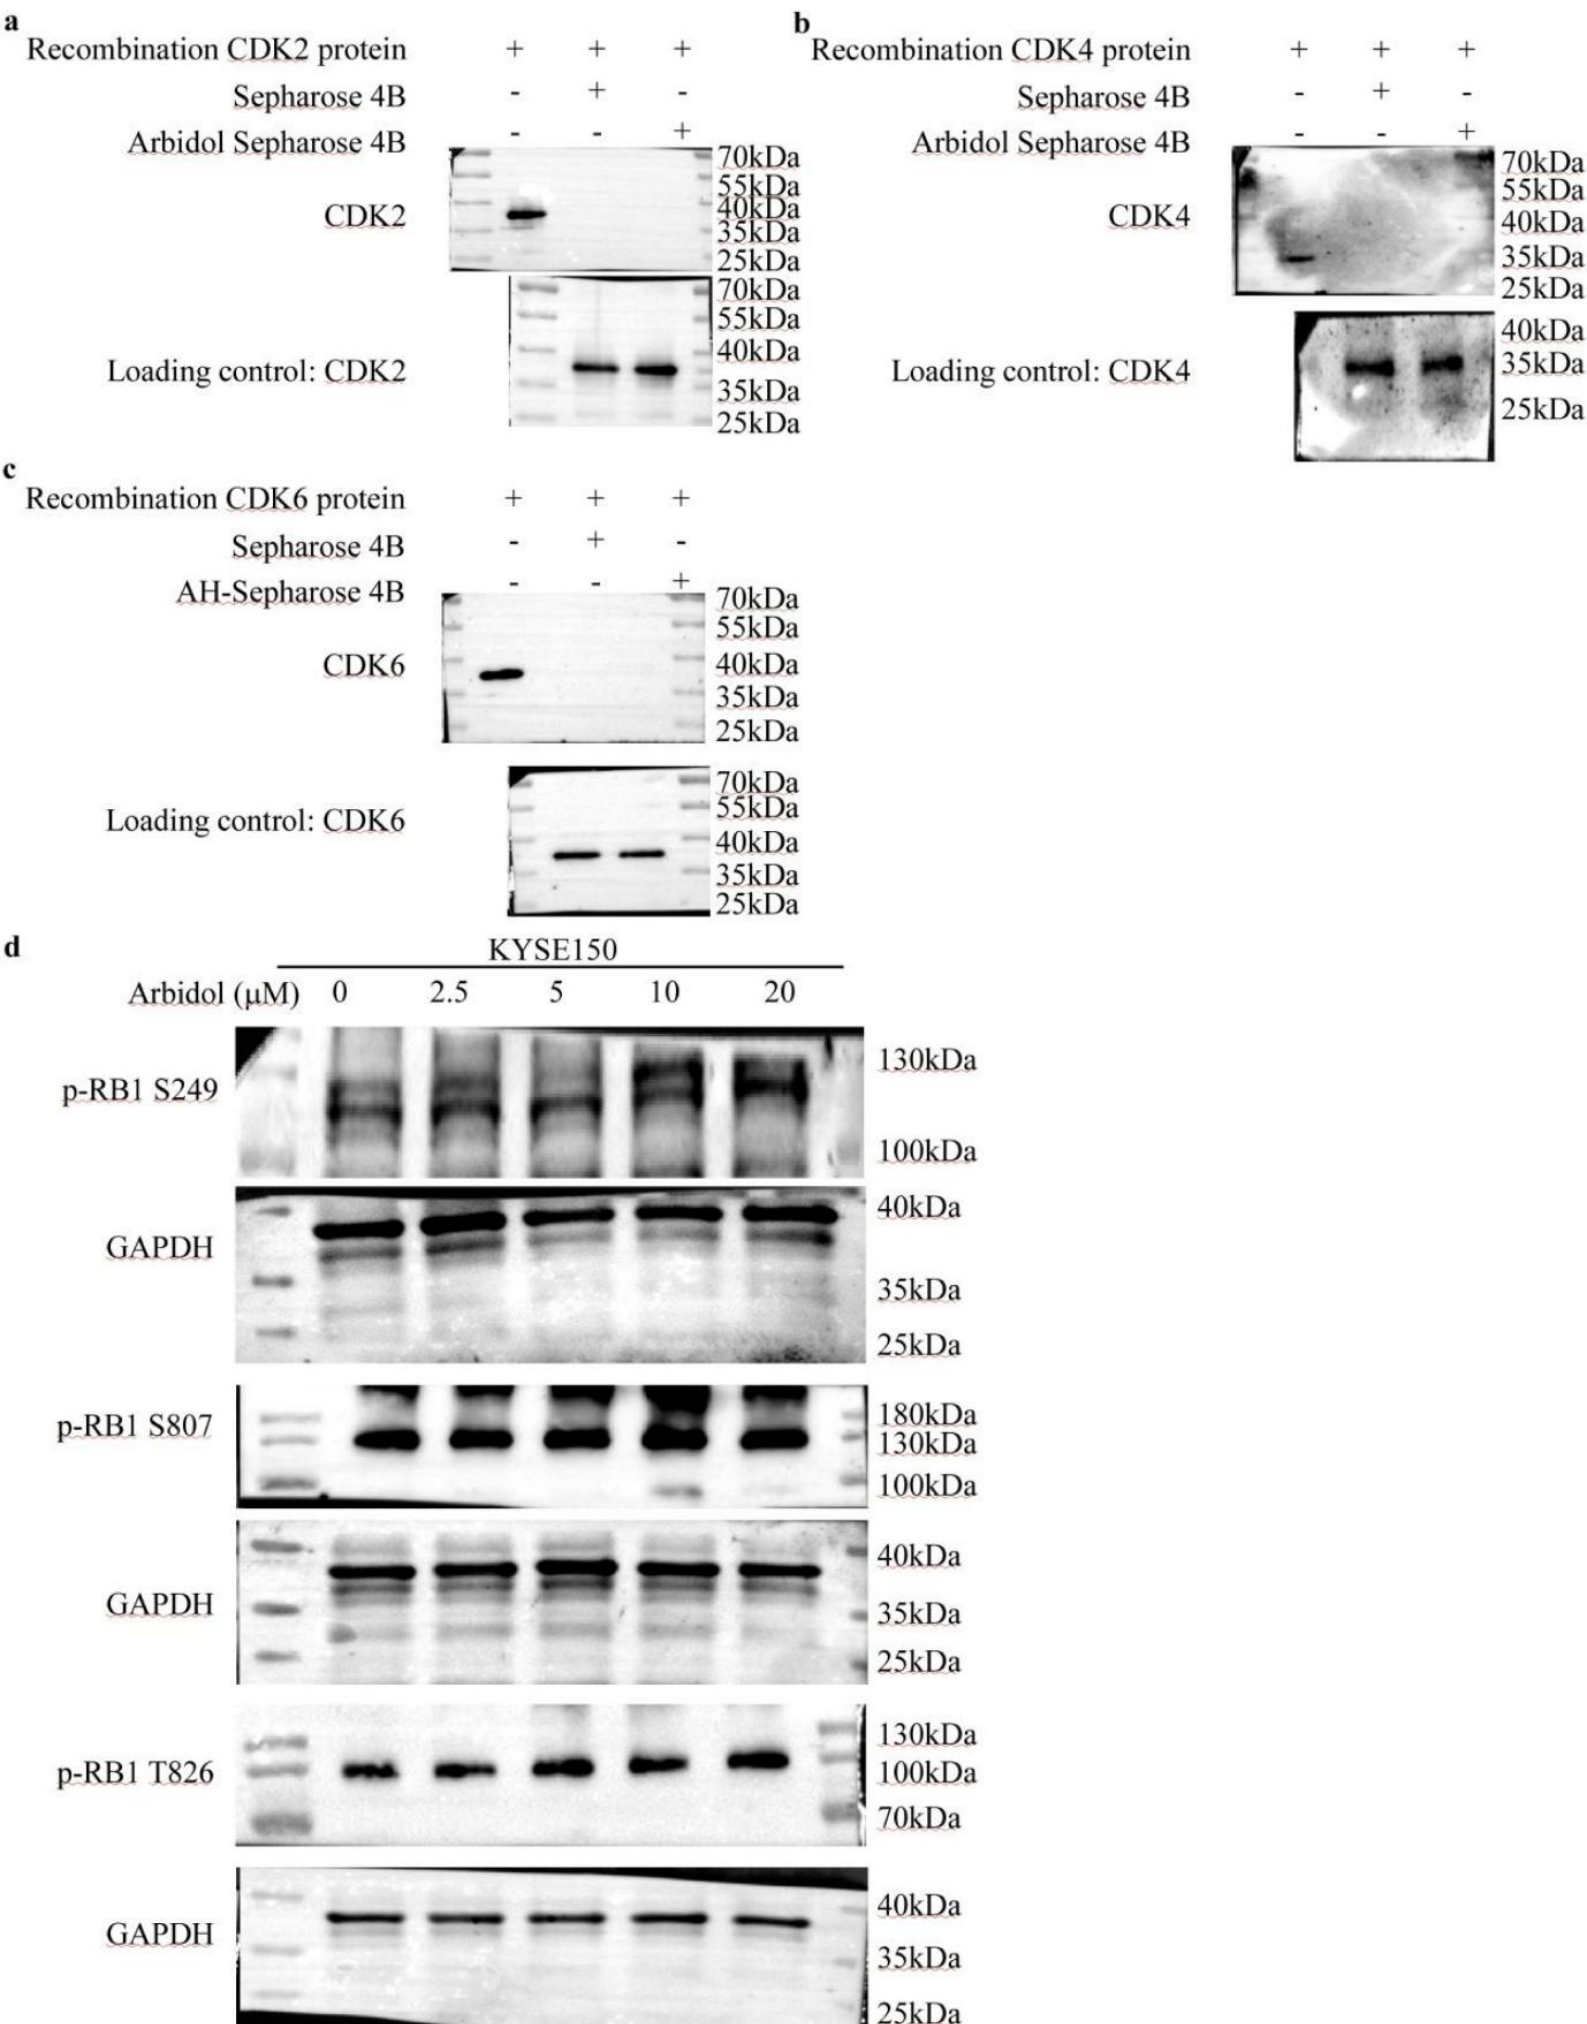

Supplement: supp [file elife-73953-supp-v1.zip]
